# Supplementary material
Source: publisher figshare collection journal article supplement (https://asha.figshare.com/ndownloader/files/32965988)
Supplement: Supplementary file 1 [file 32965988]

## Sheet: English
																										Supplemental material, Sandberg, "Tutorial for Abstract Semantic Associative Network Training (AbSANT): Theoretical Rationale, Step-by-Step Protocol, and Material Resources," Perspectives, https://doi.org/10.1044/2021_PERSP-21-00176
																										Supplemental Material S1. All normed categories and words.
Beach		Church		Courthouse		Football		Holiday		Hospital		House		Museum		Office		Park		Pharmacy		Restaurant		School		Shopping Mall		Soap Opera		Soccer		Wedding
Abstract Words	Concrete Words	Abstract Words	Concrete Words	Abstract Words	Concrete Words	Abstract Words	Concrete Words	Abstract Words	Concrete Words	Abstract Words	Concrete Words	Abstract Words	Concrete Words	Abstract Words	Concrete Words	Abstract Words	Concrete Words	Abstract Words	Concrete Words	Abstract Words	Concrete Words	Abstract Words	Concrete Words	Abstract Words	Concrete Words	Abstract Words	Concrete Words	Abstract Words	Concrete Words	Abstract Words	Concrete Words	Abstract Words	Concrete Words
calm	(beach) blanket	anxiety	aisle(s)	(non)conviction	(county) clerks	(key) play	(college)(fantasy) football(s)	anticipation	(birthday) cake	(acute)(urgent)(intensive) care	(bad)(cafeteria) food	(resting) time	(adequate) kitchen	(natural) history	(bright)(focused) lighting	(hard)work	(Christmas)(holiday) party	(recreational) activities	(baseball)(soccer) field(s)	(dental)(feminine)(personal) hygiene	(baby) food(s)	(good) service	(cold)(hot) food	(lesson)(meal) plan	(bad) food	(Christmas)(family) time	(artificial) lighting	betrayal	weddings	(extension) time	(body) padding	(wedding) vow(s)	(bachelorette) (wedding) party
chill	(beach) grass	baptism(s) [baptismal]	altar	anger	(judges) robes	(uniform) number(s)	(dance) team(s)	birthday(s)	(good)(special) food(s)	(bad)(good) news	(bright)(fluorescent)(uv) lights	(safe) haven	(comfortable) family room	amazement	(dinosaur)(fossil) bones	(staff)meeting(s)	(front) desk(s)	calm [calmness]	(blue) sky	(long) wait(s)	(baby)(OTC)(personal)(holiday) item(s)	ambiance	(good) smell(s)	(physical)(sports) activities	(elementary)(middle) school	(holiday) deals	(automatic) doors	ridiculous	director(s)	(soccer) practice	(gigantic)(soccer) field	beautiful	(dress) shoes
dangerous	(beach) towel(s)	blessed [blessings]	altar server [altar boy]	anxiety	(large)(meeting) rooms	anger	(expensive) food	buying	(the) ball dropping	anesthesia	(child) birth	anger	(cool) basement	antiquities	(display)(glass) cases	anger	(manila) folder(s)	conversation(s)	(clean)(fresh) air	anxiety	(beauty)(first aid)(home care) products	anticipation	(kids') meal	(summer) vacation	(english) classes	(seasonal) things	(beauty) products	contrived	(background) laughter	anger	(knee high) sock(s)	beginning	(first)dance(ing)
exciting	(beach) toys	bored [boredom] [boring]	bible(s)	argument(s)	(lawyer's) table(s)	anxiety [anxious]	(football) gear	celebrate(ing)	alcohol	anger	(closed)(wide bathroom) doors	care [caring]	(craft)(game)(media) room(s)	awe	(interactive) display(s)	anxiety [anxious]	(no) windows	friends	(dog)(national) park(s)	anxious	(cold)(cough) medicine(s)	atmosphere	(kids's)(secret) menu(s)	[scheduling] schedule(s)	(final) exam	anxiety	(big) parking lot	emotional	family	athletic [athleticism]	(large) crowd(s)	blessing	(wedding) cake
friends	(beach) umbrella(s)	catholic	bulletin(s)	crime	(state) flag	booing	(halftime) show	celebration(s)	break(s)	anxiety [anxious] [anxiousness]	(heart) monitor	childhood	(home cooked) meals	beautiful	(oil) painting(s)	bored [boredom] [boring]	(rolling) chair(s)	fun	(elderly) people	apprehension	(distilled) water	celebration(s)	(sous) chef(s)	academia [academics]	(final)(term) paper(s)	black Friday	(chain)(kids') stores	boredom [boring]	daytime	camaraderie	(late night)(soccer) game	celebration	aisle
fun	(beach) volleyball	celebration	candles	criminal	bailiff	camaraderie	(head) coach(es)	Christmas	calendar	blood pressure	(hospital) gown(s)	clean [cleaning] [cleanliness]	(large) dining room	bored [boredom] [boring]	(school)(field) trip(s)	business	books	happiness [happy]	(food)(ice cream) truck	blood pressure	(flu) shot	comfort(able)	(tasty) dishes	accomplishment	(multistory) buildings	busy	(Chinese) food	promiscuity [promiscuous]	music	defense	(slide) tackle	commitment	altar
happiness	(blue) sky	communion	cemetery(ies)	decisions	bench(es)	celebration	(huge) crowd(s)	day(s) off	candles	caring	(hospital)(tilting) bed(s)	comfort [comforting]	(luxurious) bathroom(s)	clean	(stuffed) dinosaur(s)	business casual	boss(es)	joyful	(green) grass	expensive	(long) line(s)	conversation	alcoholic drinks [bar drinks] [alcohol] [cocktails]	algebra	(school) sports	cheap	(Christmas) music	love	nurse(s)	desire	(soccer) ball	delicious	band
playing	(bon)fire	confession	choir	defense	briefcase(s)	cheer(s) [cheerful]	(mouth) guard	Easter	candy	clean	(intravenous)(IV) fluid	comfortable [comfortableness]	(man)(woman) cave	confusing	(tour) guide(s)	busy	box	nature	(park) bench(es)	health	(medical) school	crave(ing)	appetizer(s)	anger	administrators	convenient	(comfortable) clothes	melodramatic	housewife [housewives]	elation	(soccer) jersey(s)	ecstatic [elation]	best man
relaxation	(break)dancing	contentment	Christ	fear	chair(s)	commercial(s)	(play by play) announcer(s)	Fourth of July	cards	concern	(multistory) building	cozy	(serene) bedroom(s)	curiosity	(velvet) ropes	deadlines	breakroom [staffroom]	peace [peaceful]	(walking) path(s)	helpfulness	(pill)(plastic) bottles	delicious	bar	anxiety	apple	crowded	(food)(mall) smells	deceit(ful) [deception]	(wearing) makeup	energetic [energy]	(soccer) net	emotional	black
relaxing	(fishing) pier	doctrine	Christian	fine(s)	columns	concussion(s)	(school)(team) color(s)	friends	champagne	despair	(old)(young) people	decorate(ing)	appliances	education(al)	airplanes	efficient	briefcase	play [playing]	(walking) trail(s)	impatience [impatient]	(wrap) bandages	enjoyable	bathrooms [restroom]	bored [bordeom] [boring]	art	enjoyable [enjoyment]	(hobby) shops	romance	(older)(other) women	excitement [exciting]	(soccer) player(s)	excitement	bond
tanning	(fishy) smell(s)	faith	clergy	freedom	court stenographer	crowded	(season) ticket(s)	fun	Christmas tree	diagnosis	(sharp)(surgical) instruments	expensive	attic	excite(d)(ment)	animals	employment	building	relaxation [relaxing]	(warm) weather	information	allergy(ies)	excited [exitement] [exciting]	beer	bullying	assignments	enticements	(locator) map(s)	silly	crying	exhausting [exhaustion]	(soccer) shoes	expectations	bouquet
vacation	(pretty) people	God	clock	guilt	courtroom(s)	defense [defensive]	(shoulder) pad(s)	gathering(s)	church	disease	(shining) floors	friends	backyard	exhibit(s)	art(work)	fired	calendar	serene [serenity]	baseball	instructions	antibiotic	expensive	beverage(s)	challenge [challenging]	bell(s)	excited [excitement] [exciting]	(loyalty)(rewards) cards	(high) drama [dramatic]	mother [my mom]	forward	(soccer) tickets	expensive	boutonniere
	bathing suit(s)	guilt	community	guilty	defendant(s)	disappointment	(team) mascot	giving	costume(s)	emergency(ies)	(supporting) staff	fulfilled [fulfill(ing)]	bed(s)	expensive	artifacts	frustration	carpet(ing)	warm [warmth]	basketball	insurance	canes	friendly	bill	develop [development]	blackboard	expensive	(plastic) hangers	passion	actors [actress(es)]	foul	(soccer)(middle school)(national) team(s)	friends	bride
	beach ball(s)	happiness	cross	hope(ful)	documents	drunk [drunkenness]	(wide) receiver	Halloween	crowds	fear	ambulance(s)	happiness [happy]	blankets	friends	artist(s)	human resources	clock(s)		basketball court(s)	over the counter	cash register	friends	booth(s)	education	book(s)	friends	(potted) plants	annoying	grandma [grandmother]	goal(s)	(yellow) flags	happiness [happy]	bridesmaids
	beach house(s)	holidays	crucifix	innocence [innocent]	doorway(s)	end zone	(yard) lines	Hanukkah	dancing	happiness	baby(ies)	holidays	brother(s)	impressive	bench(es)	inefficient	coffee		bicycle(s) [bicycling]	refill	cold	full(ness)	booths	elementary	bus [ buses]	fun	[restrooms] bathrooms	dating	hospital(s)	happiness [happy]	arena	joy(ful)	ceremony
	beer	holy	family	judgment	evidence	excitement [exciting]	(yellow) flags	happiness [happy]	decorations	helpless(ness)	blood	hometown	carpet(s) [capreting]	information	big	job	computer mouse		bike [biking]	relief	computer	fun	breakfast	enthusiasm	cafeteria	happiness [happy]	accessories	anger	doctor(s)	international	bleachers	love	champagne
	bikini	love	funeral	jury duty	files	exhaustion	(yellow) seat(s)	joy	dinner	joy	cafeteria	love [loving]	chairs	interesting [intriguing]	books	management	computer(s)		birds	sick	cough(ing)	happiness [happy]	busboy	excited [excitement] [exciting]	campus	holidays	aisles	emotions	(handsome)(older) man	loss(es) [losing]	Brazil	nervous	church
	boardwalk	member	gospel	justice	gavel	expensive	Astroturf	Kwanza	Easter bunny	pain	cancer	memories	closet(s)	knowledge	children	organized	copier(s)		bushes	sickness	counter(s)	hunger	chair(s)	expectations	chair(s)	inequality [inequity]	benches	cheating	(old) people	pass	cheering	organization	crying
	boat(s)	offering	holy water	law and order	hallways	friends	band	love	family	patient(s)	chapel	nostalgia [nostalgic]	clothes [clothing]	learn(ing)	curator	presentations	coworker(s)		camping	waiting	cvs	hungry	check	friends	chalk	leisure(ly)	big	(bad) acting	(attractive)(old) people	penalty [penalities]	children	planning	decorations
	boogie board(s)	peace [peaceful] [peacefulness]	hymnals	law(s)	jail	frustrating [frustration]	barbecue(s)	Memorial Day	fireworks	prognosis	chaplain	peace [peaceful]	cold	old	docent(s)	profit	cubicle(s)		children		doctor	Italian	coffee	frustration	classmates	retail	book store	fear	television	professional	cleats	presents	DJ
	chair	prayer	incense	legal	judge(s)	fumble	beer	New Year's	flowers	relief	chart	privacy	computer(s)	quiet	documents	sales	customer(s)		climb [climbing]		drive thru(s)	loud(ness)	cook(s)	grades	classroom(s)	returns	candy	stress	offices	rule [ruling]	coach(es)	procession(al)	dress(es)
	children	quiet	Jesus	lie(s)	jury box	fun	bleachers	New years resolution(s)	football	results/result	cold	relaxation [relaxed] [relaxing]	cooking	security	fossils	stress(ed)	desktop(s)		dog(s)		drug(s)	order (up)	credit card(s)	graduate [graduation]	college	sale(s)	checkout	relationships	houses	sadness	competition	reception	drinking
	cold	religion	kneeling	lying	jury(ies)	halftime	center	peace [peaceful]	gift(s)	sad	curtains	rest	couch	thought provoking	frames	success(ful)	drawers		ducks		flu	relax(ed)(ing)	date(s)	growth	computer(s)	security	children	cheesy	(daytime) tv	score(s)	dribble [dribbling]	relief	family(ies)
	cooler	righteousness	lighting	necessary	lawyer(s)	happiness [happy]	chant(s)	preparation(s) [prepare(ing)]	green	sadness	death	sad [sadness]	decoration(s)	tired(ness)	gift shop	teamwork	email		exercise [exercising]		illness	satiated(tion)	decor	happiness [happy]	cooking	shopping	clerks	(guest)(pretty) characters		skill	Europe	speech(es)	flower girl(s)
	crabs	sermon(s)	minister	nervousness	observers	hopeful	cheering	present	ham	scared	doctor(s)	safe [safety]	dinner(s)	tours	glass	time	employee(s)		family		lab coat(s)	satisf(y)(ied)	dessert(s)	history	crowds	spend(ing)	clothing	dialogue		strategy [straegic]	fall [falling]	stress	flowers
	dog(s)	silence	music	oath	offices	interception	cheerleaders	relatives	home	scary	drugs	security	dishes		guard(s)	tired(ness)	fax machine		flowers		medication(s)	service	diner(s)	information [informative]	desk(s)	stress(ful)	coupons	location(s)		teamwork	fans	toast(s)	food
	dolphins	tradition	organ	objection	paper(s)	lose [losing] [loss]	cleats	relax [relaxation] [relaxing]	laughing [laughter]	sick(ness)	emergency room [ER]	together [ togetherness]	dishwasher		hallways		file(ing) cabinet(s)		frisbee		medicine(s)	tasty	drink(s)	inquiry [inquiries]	dormitory [dorm]	tired(ness)	credit card(s)	plot(s)		tense [tension]	food	union	gifts
	driftwood	welcoming	pastor	outrage	pillars	offense	cold	religious	meal(s)	sterile	family(ies)	warm [warmth]	dog(s)		large building(s)		files		games		name tag(s)	wait(ing)	eat(ing)	interested [interesting]	eraser(s)		crowd(s)	episode(s)		win [winning]	gloves		groom
	drinking	worship	pew(s)	punishment	plaintiff(s)	offsides	college [collegiate]	sad	music	stress	flowers		driveway		mammoth		filing		green		needle(s)		entrée(s)	knowledge	essay(s)		department store(s)	commercials		world cup	goalie [goalkeeper]		groomsman
	family(ies)		podium	questioning	podium	pain	competition	Saint (St) Patrick's Day	noise [noisy]	tired	flu		dryer		movie(s)		floor(s)		hiking		nonmedications		family	learn [learning]	grad school		displays	over the top			goalpost(s)		guests
	fish		priest	ruling(s)	police(officer)(man)	pass [passing]	concession stand(s)	shopping	ornaments	treatment	germs		drywall		reading		highlighters		hot		nurse		fast food	math	gym [gymnasium]		dressing room(s)				grass		honeymoon
	fishing		robes	security	reporters	penalty [penalties]	corner back	thankful	parties	unknown	gurneys		family		school		keyboard(s)		joggers		pharmacist		fork(s)	play	hallway(s)		elevators				header(s) [heading]		husband
	flip flops		singing	testimony(ies)	suit(s)	practice	down	Thanksgiving	picnic(s)	waiting	hallways		flowers		sculpture(s)		lunchroom		jungle gym		pharmacy technician(s)		glass(es)	preparation	highschool		employees				horn		invitation(s)
	frisbee		sitting	truth	victim(s)	rival [rivalry]	fall	time off	red	worry	icu		food		walls		manager(s)		kids		pills		host(ess)	pride	homework		escalator(s)				hot		jewelry
	glare		stained glass (windows)	worried	witness stand	Saturday(s)	family	toast(s)	Santa Claus		infection		foundation				name tag(s)		lakes		prescription(s)		hot	principal(s)	janitor		family(ies)				injuries		kiss(ing)
	heat		statues		witness(es)	support	fans	togetherness	travel(ing)		IV(s)		furniture				notepad		laughing [laughter]		receipt(s)		kitchen	recess	lectures		fitting room(s)				kick [kicking]		limo(usine)(s)
	horseshoe crabs		steeple(s)		wood	time out	field goal(s)	tradition(s) [traditional]	trick or treat(ing)		medication(s)		garage				office space		monkey bars		shelving		knife [knives]	research	library [libraries]		food court				kids		maid of honor
	hot		Sunday school			violence [voilent]	field(s)	vacation	turkey		medicine		garden(s)				paper(s)		mountains		telephone		laughter	sadness	lockers		gift [presents]				knee pads		mother of the bride(groom)
	ice cream		temple			win [winning]	first down	work(ing)	winter		needle(s)		lamps				paperclips		mulch		thermometer		lunch	science	lunch		indoors				lines		music
	jellyfish		wine				game				noise		laughter				paperwork		noisy		vitamins		main course	stress [stressful]	maps		JC penny				movement [moving]		officiant
	kayak						goalpost(s)				nurse(s)		laundry				paycheck		outdoors		white coat		money	technology	microscope(s)		jeans				mud		organ
	lifeguard(s)						grass				operating room(s)		lawnmower(s) [mower]				pencil(s)		parents				music	test(s) [testing]	middle		jewelry				noise		parents
	lifesaver						hamburgers				parking lot		living room				phone(s)		parking lot				napkin(s)	tired [tiredness]	noise		kiosks				parents		pastor
	music						helmet(s)				patient rooms		mailbox				plant(s)		pavilion				noisy	undergrad [undergraduate]	nurse		Macys				penalty kick		pews
	ocean						hotdogs				pills		music				printer(s)		pets				pasta	young	office		merchandise				rain		photographer
	palm trees						huddle(s)				pregnancy		paint				secretary		picnic tables				place setting [table settings]		parties		money				red card		photos
	picnic(s)						injuries [injury]				stethoscope		parties				sitting		picnic(s)				plate(s)		pencil(s)		movie theater(s)				referee(s)		priest
	reading						jersey(s)				stretcher(s)		pets				stapler(s)		pigeon(s)				salad		playground		parking				riot(s)		rice
	riptide						kick				surgeon		pillow(s)				swivel chair(s)		playground				server(s)		professor(s)		people				run [running]		ring bearer
	rocks						kicker				surgery		porch				tables		running				side dishes [sides]		quiz [quizzes]		register(s)				shin guard(s)		ring(s)
	sailing						linebacker(s)				test(s)		refrigerator				telephone		sand				silverware		reading		restaurants				shorts		suit(s)
	saltwater						lineman				vaccine(s)		roof				water cooler		sandbox				soda		report cards		seating [places to sit]				stadium		tables
	sand						nachos				visitors		sanctuary						sidewalks				soup		restroom(s)		shoes				sweat [sweaty] [sweating]		travel
	sandals						NFL				waiting room(s)		shelter						slide(s)				spoon		school bus		shoppers				trophy		tuxedo(s)
	sandcastle(s)						parking lot				wheelchairs		shower						soccer				table(s)		stairs		shopping bag(s)				turf		usher
	sandy						people				white		sink						soccer ball				takeout		students		skylight(s)				uniform		veil(s)
	seagulls						pigskin				x-ray(s)		sister(s)						softball				talking		study [studying]		sneakers				yelling		wedding march
	seashells						players						sleep [sleeping]						sports				tip(s)		teacher(s)		stairs				yellow card		white
	seaweed						pom poms						sofa						squirrel(s)				TVs		track		Starbucks						wine
	sharks						popcorn						space						statue(s)				waiter [waitress] [waitstaff] [waitperson]		tuition		tags
	shell(s)						quarterback(s)						stairs						streams				waiting list [wait to be seated]		uniform(s)		teenagers
	sun						rain(y)						stove						stroller(s)				waitress		university		walking
	sun hat(s)						referee(s)						table						summer				wine		whiteboard(s) [dry erase board]		wallet
	sunburn						running						television [TV]						sunny						window(s)		windows
	sunglasses						running back						utensils						sunshine						woodshop
	sunny						scoreboard						vacuum [vaccuming]						sweaty
	sunscreen						screaming						videogames						swing(s)
	sunset(s)						sideline						washer [washing machine]						tennis court(s)
	suntan lotion						snow(y)						windows						trees
	surf						soda						wood						walk [walking]
	surfboard(s)						stadium(s)						yard						water
	surfers						standing												wildlife
	surfing						stands												woodchips
	swimming						superbowl
	swimsuit						sweat
	tan						tackle
	thirsty						tailgate [tailgating]
	tide(s)						throw [thrown]
	walking						tight end
	warm						touchdown
	water						trophy [trophies]
	waves						turf
	wet						TV
	wind(y)						uniforms
							whistle
							yelling
